# Supplementary material
Source: publisher figshare collection journal article supplement (https://karger.figshare.com/ndownloader/files/18646388)
Supplement: Supplementary file 1 [file 18646388]

**FIGARO-DKD**

**National Lead Investigators / Steering Committee**

Augusto Vallejos (Argentina), Richard MacIsaac (Australia), Guntram Schernthaner (Austria), Pieter Gillard (Belgium), Freddy Eliaschewitz (Brazil), Theodora Temelkova-Kurktschiev (Bulgaria), Ellen Burgess and Sheldon Tobe (Canada), Fernando González (Chile), Zhi-Hong Liu (China), Andrés Ángelo Cadena Bonfanti and Carlos Francisco Jaramillo (Colombia), Martin Prazny (Czech Republic), Peter Rossing (Denmark), Jorma Strand (Finland), Michel Marre (France), Roland Schmieder and Christoph Wanner (Germany), Pantelis A. Sarafidis (Greece), Juliana Chan (Hong Kong), László Rosivall (Hungary), Joseph Eustace (Ireland), Ehud Grossman and Michael Motro (Israel), Giuseppe Remuzzi (Italy), Daisuke Koya and Takashi Wada (Japan), Magdalena Madero Rovalo (Mexico), Ron Gansevoort and Adriaan Kooy (Netherlands), Trine Finnes (Norway), Froilan De Leon (Philippines), Janusz Gumprecht (Poland), Ana Lourenco (Portugal), Alexander Dreval (Russia), Anantharaman Vathsala (Singapore), Aslam Amod (South Africa), Sin Gon Kim and Byung Wan Lee (South Korea), Julio Pascual Santos (Spain), Bengt-Olov Tengmark (Sweden), Christoph Stettler (Switzerland), Chien-Te Lee (Taiwan), Sukit Yamwong (Thailand), Aytekin Oguz (Turkey), Kieran McCafferty (United Kingdom), Borys Mankovsky (Ukraine), Sharon Adler, Linda Fried, Robert Toto and Mark Williams (United States), Tran Quang Khanh (Vietnam).
